# Supplementary material
Source: PubMed Central journal article supplement (PMC5322304)

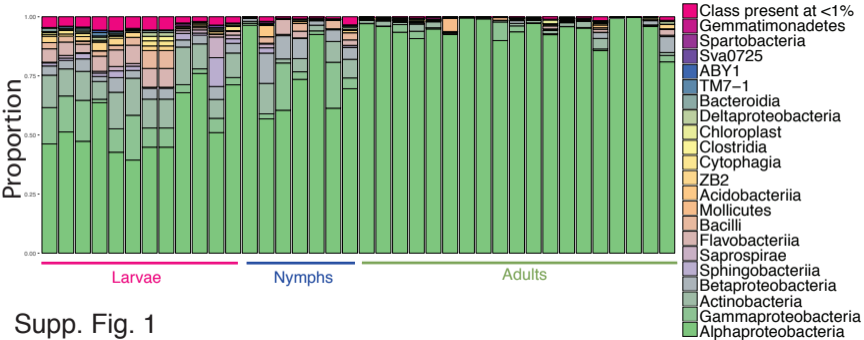

Supp. Fig. 1

Supplement: ismej2016152x2.pdf [file ismej2016152x2.pdf]

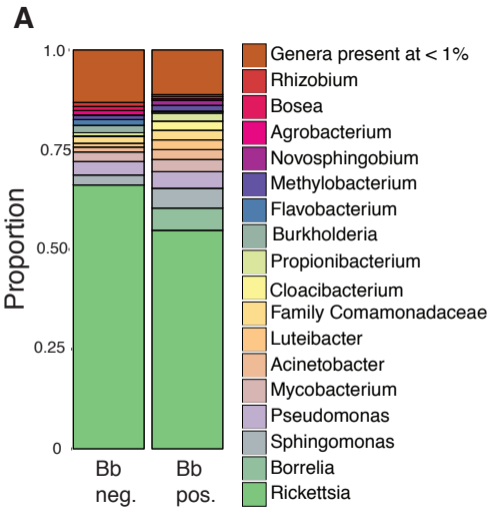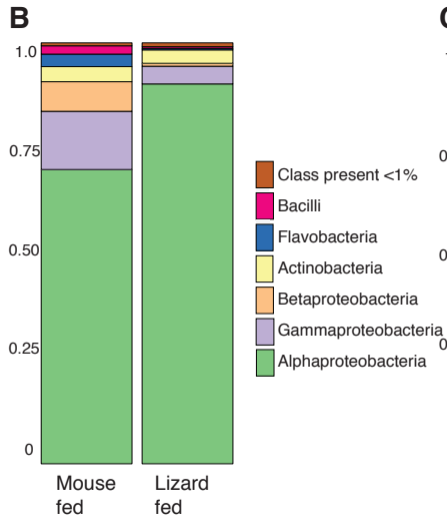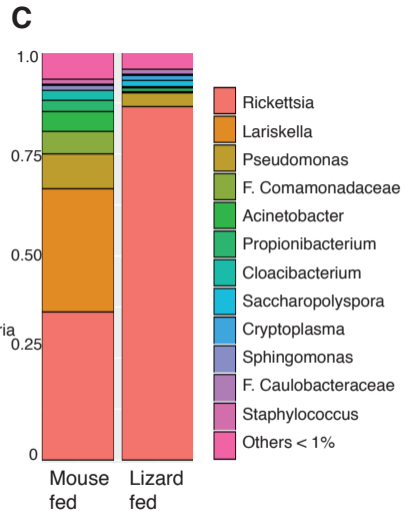

Supp. Fig. 2

Supplement: ismej2016152x3.pdf [file ismej2016152x3.pdf]

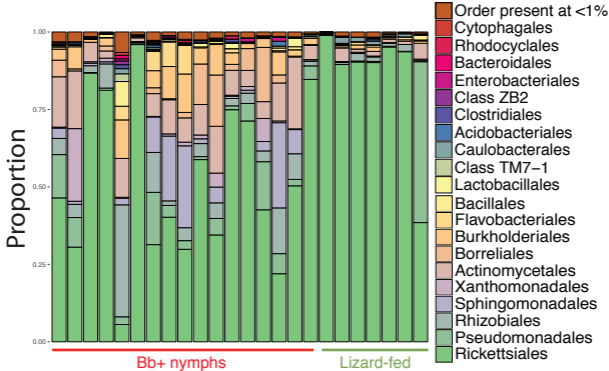

Supp. Fig. 3

Supplement: ismej2016152x4.pdf [file ismej2016152x4.pdf]
